# Supplementary material
Source: MDPI journal article supplement (https://www.mdpi.com/2071-1050/14/1/104)
Supplement: s1 [file s1 › sustainability-1467032-supplementary.pdf]

## Zinc Coated Urea for Enhanced Zinc Biofortification, Nitrogen Use Efficiency and Yield of *Basmati* Rice under *Typic Fluvents*: Supplementary figures

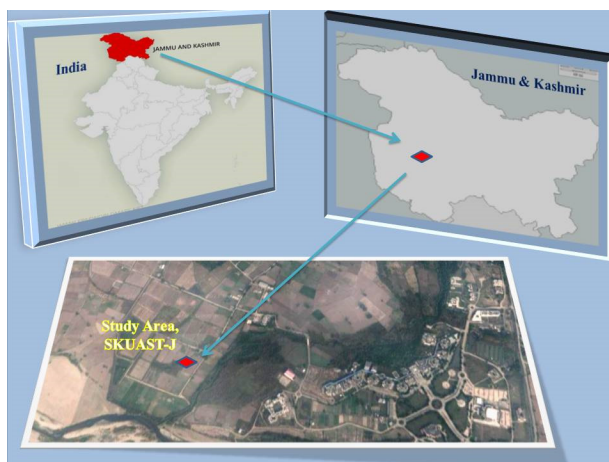

Figure S1. Map of location of study site.

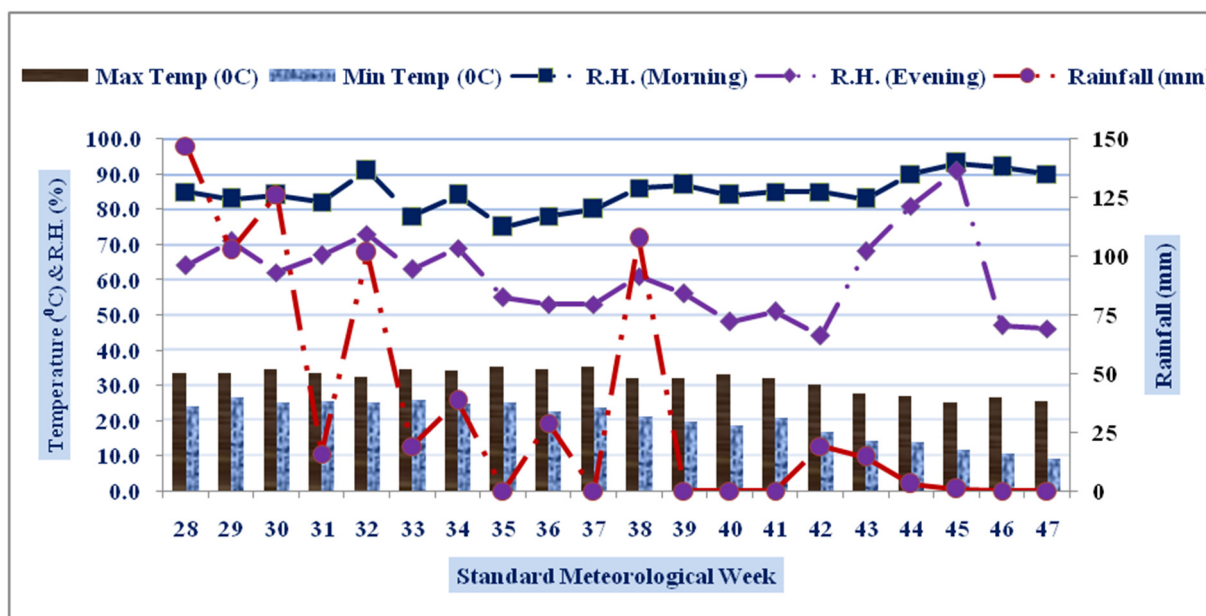

(A)

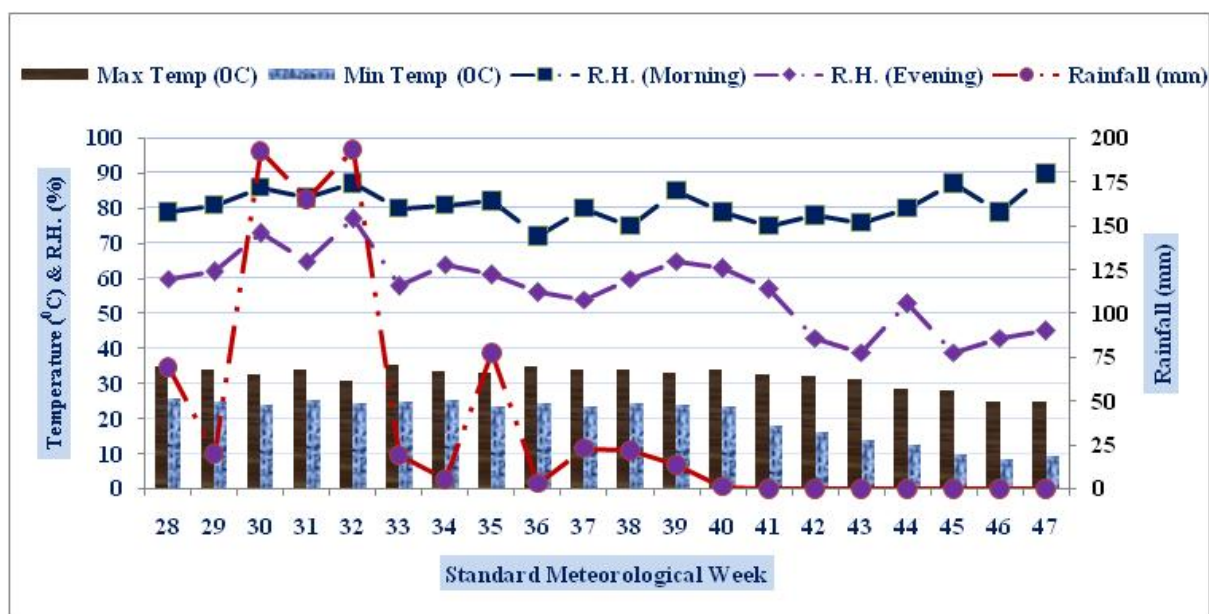

(B)

**Figure S2.** Standard meteorological weekly data observed during crop growing season; (A) *Kharif* 2015-16; (B) *Kharif* 2016-17.
